# Supplementary material
Source: publisher figshare collection journal article supplement (https://acs.figshare.com/ndownloader/files/4614418)
Supplement: Supplementary file 1 [file 4614418]

## Supplementary Figure 4

Due to the size limit for data upload, we have uploaded the annotated MS/MS spectra on the website:

[http://ms.iis.sinica.edu.tw/chem/Supplementary\\_Figure\\_4.html](http://ms.iis.sinica.edu.tw/chem/Supplementary_Figure_4.html)

This website contains the MS/MS spectra and assignment on the identified peptides in the section of "Large Scale Phosphoproteome Profiling of Non-small-cell Lung Cancer Cell (H1299)".

There are a total of six experiments listed below:

| Name of Sheet | Experiment                                                                          |
|---------------|-------------------------------------------------------------------------------------|
| SDS-PAGE      | 4 mg H1299 cell lysate with SDS-PAGE fractionation                                  |
| LC-80         | single LC-MS/MS analysis of 550 $\mu$ g H1299 cell lysate using a 80 mins gradient  |
| LC-120        | single LC-MS/MS analysis of 550 $\mu$ g H1299 cell lysate using a 120 mins gradient |
| LC-180        | single LC-MS/MS analysis of 550 $\mu$ g H1299 cell lysate using a 180 mins gradient |
| LC-210        | single LC-MS/MS analysis of 550 $\mu$ g H1299 cell lysate using a 210 mins gradient |
| LC-270        | single LC-MS/MS analysis of 550 $\mu$ g H1299 cell lysate using a 270 mins gradient |

An example of annotated spectrum can be seen in the following page. For better assessment of our identification confidence, it is noted that the format was extensively revised and prepared by home-built software to include the annotated MS/MS spectra (upper Figure in "**Mascot Matched Ions**") and raw spectra (lower Figure in "**mzXML Matched Ions**"). In addition to y- and b-ions, the precursor ions (designated as "**PR**") and neutral loss ions were also annotated.

Query 89 Hit 1  
MS/MS Fragmentation of **LGDSSLR**  
Found in **IPI00029012**, Tax\_Id=9606 Gene\_Symbol=EIF3S10 Eukaryotic translation initiation factor 3 subunit 10  
Match to Query 89: 913.3428from(457.6786,2+)  
Title: 985: Scan 3760 (rt=4268.19, f=3, i=311) [Z:\ET\imac\_paper\_gradient\4mg\_gra\_120.raw]  
Data File:4mg\_gra\_120.mgf  
**Monoisotopic mass of neutral peptide Mr(calc): 913.3428**  
**Variable modifications:**  
**S5** :Phospho (ST), with neutral losses 97.9769  
**Ions Score: 64.8 Expect: 0.000**

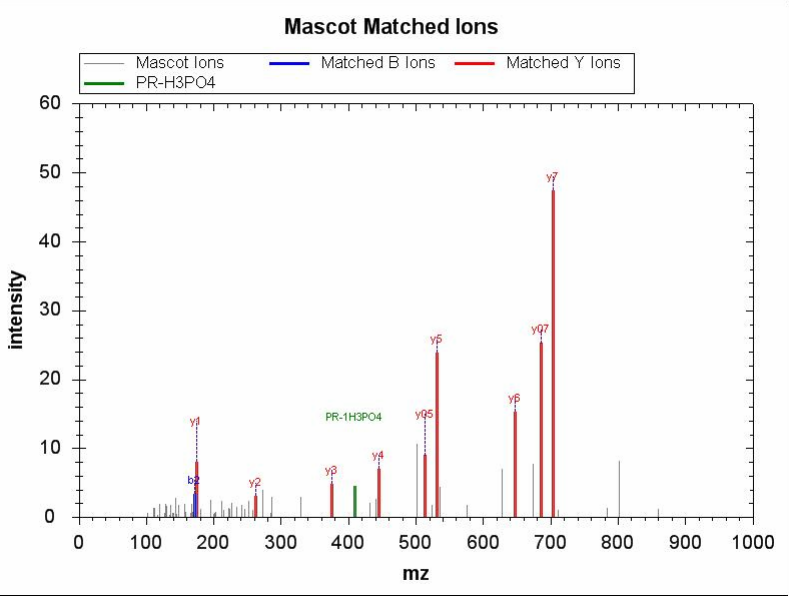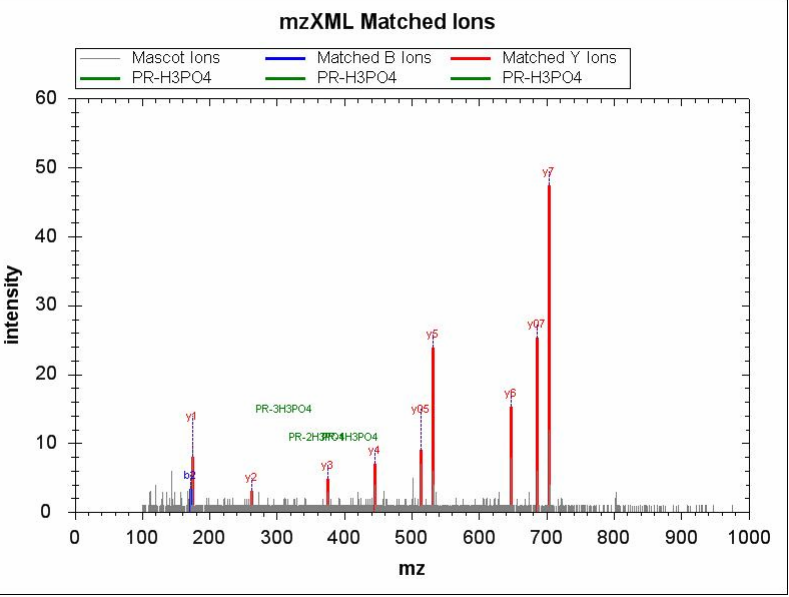

| No | b      | b++    | b0     | b0++   | Seq | y      | y++    | y*     | y*++   | y0     | y0++   | RevNo |
|----|--------|--------|--------|--------|-----|--------|--------|--------|--------|--------|--------|-------|
| 1  | 114.09 | 57.55  |        |        | L   |        |        |        |        |        |        | 8     |
| 2  | 171.11 | 86.06  |        |        | G   | 703.34 | 352.17 | 686.31 | 343.66 | 685.33 | 343.17 | 7     |
| 3  | 286.14 | 143.57 | 268.13 | 134.57 | D   | 646.32 | 323.66 | 629.29 | 315.15 | 628.30 | 314.66 | 6     |
| 4  | 373.17 | 187.09 | 355.16 | 178.08 | S   | 531.29 | 266.15 | 514.26 | 257.63 | 513.28 | 257.14 | 5     |
| 5  | 442.19 | 221.60 | 424.18 | 212.59 | S   | 444.26 | 222.63 | 427.23 | 214.12 | 426.25 | 213.63 | 4     |
| 6  | 555.28 | 278.14 | 537.27 | 269.14 | L   | 375.24 | 188.12 | 358.21 | 179.61 | 357.22 | 179.12 | 3     |
| 7  | 642.31 | 321.66 | 624.30 | 312.65 | S   | 262.15 | 131.58 | 245.12 | 123.07 | 244.14 | 122.57 | 2     |
| 8  |        |        |        |        | R   | 175.12 | 88.06  | 158.09 | 79.55  |        |        | 1     |
